# Supplementary material for: Maternal caffeine intake during pregnancy and childhood growth and overweight: results from a large Norwegian prospective observational cohort study
Source: PubMed Central journal article supplement — BMJ Open. 2018 Apr 23;8(3):e018895. doi: 10.1136/bmjopen-2017-018895 (PMC5914784; doi:10.1136/bmjopen-2017-018895), 2018-04-23
Supplement: bmjopen-2017-018895supp001.pdf [file bmjopen-2017-018895supp001.pdf]

Supplementary Table 1. Anthropometric measurements, maternal caffeine intake level and cohort retention.

| Measurement | Target age   | Age (months) |       | Cohort retention | Height (cm) |       | Cohort retention | Maternal caffeine intake level |       |     |         |      |           |
|-------------|--------------|--------------|-------|------------------|-------------|-------|------------------|--------------------------------|-------|-----|---------|------|-----------|
|             |              | Mean         | N     |                  | Mean        | N     |                  | Mean                           | N     | Low | Average | High | Very high |
| 1           | 6 months     | 1.5          | 49672 | 5.0              | 98%         | 39175 | 57               | 77%                            | 49672 | 46% | 44%     | 7%   | 3%        |
| 2           | 3 months     | 3.1          | 49912 | 6.4              | 98%         | 49122 | 62               | 96%                            | 49912 | 46% | 44%     | 7%   | 3%        |
| 3           | 5-6 months   | 5.6          | 47047 | 7.9              | 92%         | 46640 | 68               | 92%                            | 47047 | 46% | 44%     | 7%   | 3%        |
| 4           | 8 months     | 8.2          | 37612 | 8.8              | 74%         | 37493 | 71               | 74%                            | 37612 | 47% | 43%     | 7%   | 3%        |
| 5           | 1 year       | 12.2         | 38660 | 9.9              | 76%         | 39046 | 76               | 77%                            | 38660 | 47% | 43%     | 7%   | 3%        |
| 6           | 15-18 months | 15.9         | 38757 | 10.9             | 76%         | 38842 | 81               | 76%                            | 38757 | 47% | 43%     | 7%   | 3%        |
| 7           | 2 years      | 25.3         | 20485 | 13.0             | 40%         | 20855 | 89               | 41%                            | 20485 | 48% | 42%     | 7%   | 3%        |
| 8           | 3 years      | 36.0         | 30588 | 15.1             | 60%         | 29747 | 97               | 58%                            | 30588 | 47% | 43%     | 7%   | 3%        |
| 9           | 5 years      | 62.1         | 19340 | 20.0             | 38%         | 19768 | 113              | 39%                            | 19340 | 46% | 44%     | 7%   | 3%        |
| 10          | 7 years      | 84.7         | 18699 | 25.1             | 37%         | 19550 | 126              | 38%                            | 18699 | 47% | 43%     | 7%   | 3%        |
| 11          | 8 years      | 97.0         | 11685 | 28.7             | 23%         | 12312 | 132              | 24%                            | 11685 | 47% | 42%     | 7%   | 4%        |

Supplementary Table 2. Estimation of caffeine intake during pregnancy in the Norwegian Mother and Child Cohort Study.

| Food item containing caffeine                                          | Reported frequency              | Serving             | Caffeine concentration (mg/100g of food) |
|------------------------------------------------------------------------|---------------------------------|---------------------|------------------------------------------|
| Filtered coffee                                                        | Cups per day, week<br>or months | 1 cup<br>(125ml)    | 57                                       |
| Boiled/pressed coffee                                                  | Cups per day, week<br>or months | 1 cup<br>(125ml)    | 57                                       |
| Powdered instant coffee                                                | Cups per day, week<br>or months | 1 cup<br>(125ml)    | 40                                       |
| Decaffeinated coffee                                                   | Cups per day, week<br>or months | 1 cup<br>(125ml)    | 2                                        |
| Caffe latte/cappuccino                                                 | Cups per day, week<br>or months | 1 cup<br>(125ml)    | 21                                       |
| Espresso                                                               | Cups per day, week<br>or months | 1 cup<br>(125ml)    | 114                                      |
| Black tea                                                              | Cups per day, week<br>or months | 1 cup<br>(250ml)    | 16                                       |
| Caffeinated soft drinks, sugar<br>sweetened and artificially sweetened | Cups per day, week<br>or months | 1 glass<br>(250 ml) | 12                                       |
| Energy drink                                                           | Cups per day, week<br>or months | 1 glass<br>(250 ml) | 15                                       |
| Chocolate milk                                                         | Cups per day, week<br>or months | 1 glass<br>(250 ml) | 15                                       |
| Chocolate, medium dark                                                 |                                 |                     | 38                                       |
| Sandwich spreads with cocoa                                            |                                 |                     | 13                                       |
| Deserts with coca                                                      |                                 |                     | 3                                        |
| Cakes with cocoa                                                       |                                 |                     | 4                                        |
| Sweets with cocoa                                                      |                                 |                     | 9                                        |

Supplementary Table 3. Definitions of overweight and obesity

| Reference                                            | Description                                         | Age (years) | Overweight and/or obesity (kg/m <sup>2</sup> ) |         | Prevalence (%) <sup>a</sup> |         |
|------------------------------------------------------|-----------------------------------------------------|-------------|------------------------------------------------|---------|-----------------------------|---------|
|                                                      |                                                     |             | Males                                          | Females | Males                       | Females |
| International Obesity Task Force (IOTF) <sup>1</sup> | Study-specific BMIs were calculated for age and sex | 3           | 17.89                                          | 17.56   | 10.77                       | 12.44   |
| (BMJ 2000 May 6; 320 (7244); 1240-Table 4)           |                                                     | 5           | 17.42                                          | 17.15   | 14.30                       | 18.28   |
|                                                      |                                                     | 8           | 18.44                                          | 18.35   | 3.61                        | 5.24    |

<sup>a</sup>Based on BMI calculated from the predicted anthropometric data.

From Cole TJ, Bellizzi MC, Flegal KM, Dietz WH. Establishing a standard definition for child overweight and obesity worldwide: international survey. *BMJ*. 2000;320(7244):1240-1243

Supplementary Table 4. Parental and pregnancy-related characteristics by category of maternal caffeine intake during pregnancy (n=50,943)

|                                                  | Maternal caffeine intake during pregnancy   |      |                                                    |      |                                                 |      |                                                   |      |
|--------------------------------------------------|---------------------------------------------|------|----------------------------------------------------|------|-------------------------------------------------|------|---------------------------------------------------|------|
|                                                  | Low caffeine intake (<50mg/day)<br>N=23,437 |      | Average caffeine intake (50-199mg/day)<br>N=22,239 |      | High caffeine intake (200-299mg/day)<br>N=3,633 |      | Very high caffeine intake (≥300mg/day)<br>N=1,634 |      |
|                                                  | N                                           | %    | N                                                  | %    | N                                               | %    | N                                                 | %    |
| Maternal age (years)                             |                                             |      |                                                    |      |                                                 |      |                                                   |      |
| <20                                              | 247                                         | 1.1  | 94                                                 | 0.4  | 20                                              | 0.6  | 6                                                 | 0.4  |
| 20-29                                            | 12,426                                      | 53.0 | 8,643                                              | 38.9 | 1,185                                           | 32.6 | 474                                               | 29.0 |
| ≥30                                              | 10,764                                      | 45.9 | 13,502                                             | 60.7 | 2,428                                           | 66.8 | 1,154                                             | 70.6 |
| Maternal education (years)                       |                                             |      |                                                    |      |                                                 |      |                                                   |      |
| <13                                              | 7,025                                       | 30.0 | 5,993                                              | 27.0 | 1,142                                           | 31.4 | 755                                               | 46.2 |
| 13-16                                            | 10,725                                      | 45.7 | 9,538                                              | 42.9 | 1,512                                           | 42.6 | 623                                               | 38.1 |
| >16                                              | 5,687                                       | 24.3 | 6,708                                              | 30.1 | 979                                             | 27.0 | 256                                               | 15.7 |
| Parity                                           |                                             |      |                                                    |      |                                                 |      |                                                   |      |
| Primiparous                                      | 14,260                                      | 60.8 | 11,053                                             | 49.7 | 1,492                                           | 41.1 | 492                                               | 30.1 |
| Multiparous                                      | 9,177                                       | 39.2 | 11,186                                             | 50.3 | 2,141                                           | 58.9 | 1,142                                             | 69.9 |
| Pre-pregnancy BMI (kg/m <sup>2</sup> )           |                                             |      |                                                    |      |                                                 |      |                                                   |      |
| <18.5                                            | 690                                         | 2.9  | 644                                                | 2.9  | 89                                              | 2.5  | 44                                                | 2.7  |
| 18.5-24.9                                        | 15,466                                      | 66.0 | 14,893                                             | 67.0 | 2,416                                           | 66.5 | 999                                               | 61.1 |
| 25-29.9                                          | 5,071                                       | 21.6 | 4,838                                              | 21.7 | 785                                             | 21.6 | 406                                               | 24.9 |
| ≥30                                              | 2,210                                       | 9.4  | 1,864                                              | 8.4  | 343                                             | 9.4  | 185                                               | 11.3 |
| Maternal daily energy intake (in tertiles, kcal) |                                             |      |                                                    |      |                                                 |      |                                                   |      |
| <2,000                                           | 9,211                                       | 39.3 | 6,791                                              | 30.5 | 802                                             | 22.1 | 347                                               | 21.2 |
| 2,000-2,500                                      | 7,803                                       | 33.3 | 7,619                                              | 34.3 | 1,137                                           | 31.3 | 458                                               | 28.1 |
| >2,500                                           | 6,423                                       | 27.4 | 7,829                                              | 35.2 | 1,694                                           | 46.6 | 829                                               | 50.7 |
| Maternal smoking during pregnancy                |                                             |      |                                                    |      |                                                 |      |                                                   |      |
| Never                                            | 22,500                                      | 96.0 | 20,532                                             | 92.3 | 3,005                                           | 82.7 | 999                                               | 61.1 |
| Ever                                             | 937                                         | 4.0  | 1,707                                              | 7.7  | 628                                             | 17.3 | 635                                               | 38.9 |
| Nausea/vomiting in pregnancy                     |                                             |      |                                                    |      |                                                 |      |                                                   |      |
| Never                                            | 6,057                                       | 25.8 | 6,949                                              | 31.3 | 1,358                                           | 37.4 | 673                                               | 41.2 |
| Ever                                             | 17,380                                      | 74.2 | 15,290                                             | 68.7 | 2,275                                           | 62.6 | 961                                               | 58.8 |
| Paternal BMI (kg/m <sup>2</sup> )                |                                             |      |                                                    |      |                                                 |      |                                                   |      |
| <18.5                                            | 51                                          | 0.2  | 47                                                 | 0.2  | 13                                              | 0.3  | 5                                                 | 0.3  |
| 18.5-24.9                                        | 10,538                                      | 44.6 | 9,831                                              | 44.2 | 1,547                                           | 42.6 | 661                                               | 40.4 |
| 25-29.9                                          | 10,526                                      | 45.3 | 10,254                                             | 46.1 | 1,699                                           | 46.8 | 756                                               | 46.3 |
| ≥30                                              | 2,322                                       | 9.9  | 2,107                                              | 9.5  | 374                                             | 10.3 | 212                                               | 13.0 |
| Paternal smoking during pregnancy                |                                             |      |                                                    |      |                                                 |      |                                                   |      |
| Never                                            | 19,338                                      | 82.5 | 18,029                                             | 81.1 | 2,752                                           | 75.7 | 1,007                                             | 61.6 |
| Ever                                             | 4,099                                       | 17.5 | 4,210                                              | 18.9 | 881                                             | 24.3 | 627                                               | 38.4 |

|                            |        |       |        |       |       |       |      |       |
|----------------------------|--------|-------|--------|-------|-------|-------|------|-------|
| Paternal caffeine intake   |        |       |        |       |       |       |      |       |
| 1 <sup>st</sup> quartile   | 2,253  | (29%) | 1,504  | (20%) | 168   | (15%) | 44   | (14%) |
| 2 <sup>nd</sup> quartile   | 1,605  | (21%) | 1,495  | (20%) | 202   | (18%) | 51   | (16%) |
| 3 <sup>rd</sup> quartile   | 1,950  | (26%) | 2,186  | (30%) | 356   | (33%) | 82   | (25%) |
| 4 <sup>th</sup> quartile   | 1,832  | (24%) | 2,211  | (30%) | 371   | (34%) | 145  | (45%) |
| Child's gender             |        |       |        |       |       |       |      |       |
| Boys                       | 11,821 | 50.4  | 11,430 | 51.4  | 1,871 | 51.5  | 820  | 50.2  |
| Girls                      | 11,616 | 49.6  | 10,809 | 48.6  | 1,762 | 48.5  | 814  | 49.8  |
| Gestational age            |        |       |        |       |       |       |      |       |
| (in weeks,<br>median, IQR) | 40.1   | 1.9   | 40.3   | 1.9   | 40.3  | 1.9   | 40.3 | 1.7   |

---

p-value < 10<sup>-5</sup> of chi square tests of all cross-tabulations presented in table

<sup>1</sup>IOM : Institute of Medicine

Supplementary Table 5. Maternal caffeine intake in pregnancy and risk of overweight/obesity at age 3, 5 and 8 years, after adjustment for birth weight.

| Maternal daily caffeine intake | Risk of overweight and/or obesity <sup>a</sup> , after additional adjustment for birth weight |                  |             |                  |             |                  |
|--------------------------------|-----------------------------------------------------------------------------------------------|------------------|-------------|------------------|-------------|------------------|
|                                | Age 3 years                                                                                   |                  | Age 5 years |                  | Age 8 years |                  |
|                                | OR                                                                                            | 95%CI            | OR          | 95%CI            | OR          | 95%CI            |
| Low (<50 mg)                   | 1.00                                                                                          |                  | 1.00        |                  | 1.00        |                  |
| Average (50-199 mg)            | <b>1.08</b>                                                                                   | <b>1.02,1.15</b> | 1.03        | 0.97,1.08        | 0.97        | 0.88,1.06        |
| High (200-299 mg)              | <b>1.21</b>                                                                                   | <b>1.09,1.36</b> | <b>1.16</b> | <b>1.05,1.28</b> | 1.14        | 0.96,1.34        |
| Very high (≥300 mg)            | <b>1.53</b>                                                                                   | <b>1.32,1.78</b> | <b>1.36</b> | <b>1.19,1.55</b> | <b>1.35</b> | <b>1.09,1.68</b> |

The same population was included at each age since the outcome was defined using model-derived anthropometrics.

All models adjusted for maternal age, parity, parental education, pre-pregnancy BMI, total energy intake, nausea and/or vomiting during pregnancy, paternal BMI, parental smoking during pregnancy, gestational age, gender and birth weight

<sup>a</sup> Overweight and/or obesity in children, according to the International Obesity Task Force definition

Supplementary Table 6. Maternal caffeine intake during pregnancy from different sources and risk of excess growth in infancy (from birth to age 12 months) and overweight/obesity at age 3, 5 and 8 years

|                            | Child's growth parameters  |             |             |                                                |             |             |                                                |             |             |                                                |             |             |
|----------------------------|----------------------------|-------------|-------------|------------------------------------------------|-------------|-------------|------------------------------------------------|-------------|-------------|------------------------------------------------|-------------|-------------|
|                            | Excess growth <sup>a</sup> |             |             | Overweight/obesity at age 3 years <sup>b</sup> |             |             | Overweight/obesity at age 5 years <sup>b</sup> |             |             | Overweight/obesity at age 8 years <sup>b</sup> |             |             |
|                            | OR                         | 95%         | CI          | OR                                             | 95%         | CI          | OR                                             | 95%         | CI          | OR                                             | 95%         | CI          |
| Caffeine from black coffee |                            |             |             |                                                |             |             |                                                |             |             |                                                |             |             |
| 0-50                       | 1.00                       |             |             | 1.00                                           |             |             | 1.00                                           |             |             | 1.00                                           |             |             |
| 50-200                     | <b>1.18</b>                | <b>1.11</b> | <b>1.26</b> | <b>1.18</b>                                    | <b>1.11</b> | <b>1.26</b> | <b>1.12</b>                                    | <b>1.05</b> | <b>1.18</b> | <b>1.11</b>                                    | <b>1.00</b> | <b>1.23</b> |
| 200-300                    | <b>1.31</b>                | <b>1.06</b> | <b>1.62</b> | 1.14                                           | 0.91        | 1.41        | 1.11                                           | 0.92        | 1.34        | 1.09                                           | 0.77        | 1.53        |
| >300                       | <b>1.72</b>                | <b>1.45</b> | <b>2.03</b> | <b>1.69</b>                                    | <b>1.44</b> | <b>1.99</b> | <b>1.39</b>                                    | <b>1.20</b> | <b>1.61</b> | <b>1.48</b>                                    | <b>1.17</b> | <b>1.88</b> |
| Caffeine from black tea    |                            |             |             |                                                |             |             |                                                |             |             |                                                |             |             |
| 0-50                       | 1.00                       |             |             | 1.00                                           |             |             | 1.00                                           |             |             | 1.00                                           |             |             |
| 50-200                     | <b>1.11</b>                | <b>1.01</b> | <b>1.21</b> | 1.07                                           | 0.98        | 1.18        | 1.05                                           | 0.97        | 1.14        | <b>1.20</b>                                    | <b>1.04</b> | <b>1.38</b> |
| 200-300                    | 1.74                       | 0.93        | 3.25        | 1.16                                           | 0.56        | 2.40        | 1.22                                           | 0.65        | 2.31        | 0.28                                           | 0.04        | 2.07        |
| >300                       | 1.67                       | 0.50        | 5.54        | 0.86                                           | 0.20        | 3.75        | 0.86                                           | 0.25        | 2.97        | NE                                             |             |             |
| Caffeine from soda drinks  |                            |             |             |                                                |             |             |                                                |             |             |                                                |             |             |
| 0-50                       | 1.00                       |             |             | 1.00                                           |             |             | 1.00                                           |             |             | 1.00                                           |             |             |
| 50-200                     | <b>1.20</b>                | <b>1.08</b> | <b>1.33</b> | 0.96                                           | 0.86        | 1.07        | 0.96                                           | 0.88        | 1.06        | 1.01                                           | 0.87        | 1.18        |
| 200-300                    | 1.40                       | 0.95        | 2.06        | 1.13                                           | 0.77        | 1.65        | 1.18                                           | 0.84        | 1.65        | 1.48                                           | 0.91        | 2.41        |
| >300                       | 1.21                       | 0.22        | 6.58        | 0.48                                           | 0.06        | 3.79        | 0.73                                           | 0.16        | 3.34        | NE                                             |             |             |

NE: not estimated

<sup>a</sup> Excess growth is defined as a WHO weight-for-age z-score difference >0.67 between birth and age 12 months. Model adjusted for maternal age, parity, parental education, pre-pregnancy BMI, total energy intake, nausea and/or vomiting during pregnancy, paternal BMI, parental smoking during pregnancy, gestational age and gender, and mutually adjusted for maternal caffeine intake from black coffee, black tea and soda drinks.

<sup>b</sup> Overweight and/or obesity, according to International Obesity Task Force definition.

All models adjusted for maternal age, parity, parental education, pre-pregnancy BMI, total energy intake, nausea and/or vomiting during pregnancy, paternal BMI, parental smoking during pregnancy, gestational age, gender and birth weight, and mutually adjusted for maternal caffeine intake from black coffee, black tea and soda drinks.

Supplementary Table 7. Sensitivity after excluding very high caffeine drinkers and using no black coffee drinkers (n=23,402) as the reference group.

|                      | No coffee drinkers<br>OR<br>(95%CI) | Caffeine intake <199mg<br>OR<br>(95%CI) | Caffeine intake 200-299mg<br>OR<br>(95%CI) |
|----------------------|-------------------------------------|-----------------------------------------|--------------------------------------------|
| Excess infant growth | 1.00                                | 1.07 (1.01,1.13)                        | 1.25 (1.12,1.39)                           |
| <b>Overweight</b>    |                                     |                                         |                                            |
| 3 years              | 1.00                                | 1.12 (1.06,1.19)                        | 1.21 (1.08,1.35)                           |
| 5 years              | 1.00                                | 1.08 (1.03,1.14)                        | 1.17 (1.06,1.29)                           |
| 8 years              | 1.00                                | 1.02 (0.93,1.12)                        | 1.15 (0.98,1.36)                           |

<sup>a</sup> Excess growth is defined as a WHO weight-for-age z-score difference >0.67 between birth and age 12 months.

<sup>b</sup> Overweight and/or obesity, according to International Obesity Task Force definition.

Models adjusted for maternal age, parity, parental education, pre-pregnancy BMI, total energy intake, nausea and/or vomiting during pregnancy, paternal BMI, parental smoking during pregnancy, gestational age and gender.



Supplementary Table 8. Maternal caffeine intake in early pregnancy and risk of overweight/obesity at pre-school (3-5 years) and school (6-8 years) age, using measured anthropometric values

| Maternal daily caffeine intake | Risk of overweight and/or obesity at pre-school and school age <sup>a</sup> |             |                  |                       |             |                  |
|--------------------------------|-----------------------------------------------------------------------------|-------------|------------------|-----------------------|-------------|------------------|
|                                | Pre-school age (n=31,482)                                                   |             |                  | School age (n=19,722) |             |                  |
|                                | N/% cases                                                                   | OR          | 95% CI           | N/% cases             | OR          | 95% CI           |
| Low (<50 mg)                   | 14,723/13                                                                   | 1.00        |                  | 9,204/12              | 1.00        |                  |
| Average (50-199 mg)            | 13,706/14                                                                   | 1.06        | 0.99,1.14        | 8,471/12              | 1.03        | 0.93,1.13        |
| High (200-299 mg)              | 2,135/16                                                                    | <b>1.21</b> | <b>1.07,1.39</b> | 1,386/14              | 1.13        | 0.95,1.35        |
| Very high (≥300 mg)            | 918/20                                                                      | <b>1.52</b> | <b>1.27,1.81</b> | 664/18                | <b>1.32</b> | <b>1.04,1.66</b> |

All models adjusted for maternal age, parity, parental education, pre-pregnancy BMI, total energy intake, nausea and/or vomiting during pregnancy, paternal BMI, parental smoking during pregnancy, gestational age and gender

<sup>a</sup> Overweight and/or obesity, according to International Obesity Task Force definition.

Supplementary Table 9. Maternal caffeine intake in early pregnancy and child's height and height gain velocity during childhood

|                                                  | Child's developmental period      |                       |                       |                       |                       |                       |                       |
|--------------------------------------------------|-----------------------------------|-----------------------|-----------------------|-----------------------|-----------------------|-----------------------|-----------------------|
|                                                  | Infancy                           |                       | Toddlerhood           |                       | Pre-school age        |                       | School age            |
|                                                  | 3 m                               | 6 m                   | 12 m                  | 18 m                  | 3 y                   | 5 y                   | 8 y                   |
| Maternal daily caffeine intake                   | Beta<br>(95% CI)                  | Beta<br>(95% CI)      | Beta<br>(95% CI)      | Beta<br>(95% CI)      | Beta<br>(95% CI)      | Beta<br>(95% CI)      | Beta<br>(95% CI)      |
| <b><i>Height (in cm)</i></b>                     |                                   |                       |                       |                       |                       |                       |                       |
| Average (50-199 mg)                              | 0.00<br>(-0.03,0.03)              | 0.00<br>(-0.04,0.03)  | -0.03<br>(-0.07,0.02) | -0.04<br>(-0.09,0.00) | -0.05<br>(-0.10,0.01) | -0.02<br>(-0.09,0.05) | 0.02<br>(-0.07,0.10)  |
| High (200-299 mg)                                | -0.01<br>(-0.07,0.05)             | -0.01<br>(-0.07,0.06) | -0.04<br>(-0.12,0.04) | -0.07<br>(-0.15,0.02) | -0.09<br>(-0.20,0.01) | -0.08<br>(-0.21,0.05) | -0.05<br>(-0.21,0.12) |
| Very high ( $\geq 300$ mg)                       | -0.03<br>(-0.12,0.05)             | -0.01<br>(-0.10,0.09) | 0.00<br>(-0.12,0.11)  | -0.02<br>(-0.15,0.10) | -0.09<br>(-0.24,0.07) | -0.13<br>(-0.31,0.06) | -0.17<br>(-0.41,0.07) |
| <b><i>Height gain velocity (in mm/month)</i></b> |                                   |                       |                       |                       |                       |                       |                       |
| Average (50-199 mg)                              | <b>0.05</b><br><b>(0.02,0.09)</b> | -0.01<br>(-0.05,0.02) | -0.03<br>(-0.07,0.01) | -0.01<br>(-0.05,0.03) | 0.02<br>(-0.02,0.06)  | 0.02<br>(-0.02,0.06)  | 0.02<br>(-0.02,0.07)  |
| High (200-299 mg)                                | <b>0.08</b><br><b>(0.01,0.14)</b> | -0.01<br>(-0.08,0.05) | -0.05<br>(-0.12,0.02) | -0.04<br>(-0.11,0.04) | 0.01<br>(-0.07,0.08)  | 0.02<br>(-0.06,0.09)  | 0.02<br>(-0.06,0.10)  |
| Very high ( $\geq 300$ mg)                       | <b>0.11</b><br><b>(0.01,0.21)</b> | 0.04<br>(-0.06,0.14)  | -0.04<br>(-0.14,0.06) | -0.06<br>(-0.16,0.05) | -0.04<br>(-0.15,0.07) | -0.03<br>(-0.14,0.08) | -0.03<br>(-0.15,0.09) |

Abbreviations: Beta: beta coefficients, CI: confidence intervals

Effect estimates derive from linear mixed effect models with input of all anthropometric information from age 1 month to 8 years and adjusted for maternal age, parity, maternal education, pre-pregnancy BMI, nausea and/or vomiting during pregnancy, maternal smoking during pregnancy, gestational age, gender and birth weight
